# Supplementary material
Source: MDPI journal article supplement (https://www.mdpi.com/2311-5629/8/4/61)
Supplement: s1 [file s1]

## **Supplementary Materials**

to the article

# **Polarizability of Kekulene, Septulene and Nearest Non-Planar Polycyclic Aromatic Hydrocarbons**

**Timur Lukmanov <sup>1</sup>, Arslan F. Akhmetov <sup>2</sup> and Denis Sh. Sabirov <sup>1,\*</sup>**

<sup>1</sup> Institute of Petrochemistry and Catalysis UFRC RAS, 450075 Ufa, Russia

<sup>2</sup> Department of Oil and Gas Technology, Ufa State Petroleum Technological University, 450000 Ufa, Russia

\* Correspondence: [diozno@mail.ru](mailto:diozno@mail.ru)

## Computational results

The method is PBE/3 $\zeta$ . The coordinates and polarizability values are in Å and atomic units, respectively.

### [11]helicene

#### Energy

E = -1766.979941      E0 = -1766.430329

ZPVE = 0.549612 a.u. = 344.8867 kcal/mol

H298 = 365.5537 kcal/mol

#### Dipole Polarizability

616.695625

-2.148694    644.130037

-9.965852    0.644019    362.07324

#### Coordinates

|   |              |              |              |
|---|--------------|--------------|--------------|
| 6 | 2.407872320  | -1.785598530 | -2.422098790 |
| 6 | 3.580952690  | -0.981886540 | -2.517909040 |
| 6 | 0.248506440  | -2.286967440 | 1.061572760  |
| 6 | 1.523579210  | -2.776803160 | 1.470506020  |
| 6 | 0.118362300  | -0.943626180 | 0.595135150  |
| 6 | 1.190188080  | -0.016395050 | 0.915071070  |
| 6 | 2.486162610  | -0.573170080 | 1.149646610  |
| 6 | 2.626117500  | -1.968524310 | 1.409544950  |
| 6 | 1.047635800  | 1.418913380  | 1.074275170  |
| 6 | 2.216868710  | 2.224438820  | 0.954380970  |
| 6 | 3.506839000  | 1.618431250  | 0.954490200  |
| 6 | 3.634503340  | 0.270456270  | 1.152189510  |
| 6 | -0.174953760 | 2.087975680  | 1.496720220  |
| 6 | -0.250539320 | 3.518748510  | 1.435666930  |
| 6 | 0.904456010  | 4.275003950  | 1.067512550  |
| 6 | 2.107380040  | 3.649904460  | 0.903335910  |
| 6 | -1.256529620 | 1.407236480  | 2.111620720  |
| 6 | -2.387772710 | 2.079066030  | 2.541141700  |
| 6 | -2.501565730 | 3.473549070  | 2.370549650  |
| 6 | -1.438529800 | 4.178611110  | 1.839024060  |
| 6 | -0.902279890 | -3.128345730 | 1.132462940  |
| 1 | 1.606715930  | -3.819425110 | 1.781321310  |
| 6 | -1.092985530 | -0.602699770 | -0.125623670 |
| 1 | 3.622088560  | -2.360656630 | 1.622147590  |
| 1 | 4.386175590  | 2.260409020  | 0.879052720  |
| 1 | 4.616446810  | -0.187829940 | 1.281116080  |
| 1 | 0.824005880  | 5.361763800  | 1.006426940  |
| 1 | 3.017173150  | 4.228608210  | 0.733194460  |
| 1 | -1.181933620 | 0.336402900  | 2.280670860  |
| 1 | -3.191968310 | 1.522058680  | 3.023199130  |
| 1 | -3.403585930 | 3.994644780  | 2.693267410  |
| 1 | -1.480735770 | 5.266660360  | 1.758296650  |
| 6 | -2.259886980 | -1.378422420 | 0.142769830  |
| 6 | -2.135391940 | -2.646703220 | 0.784761480  |
| 1 | -0.785313070 | -4.138743180 | 1.527405170  |
| 6 | -1.216984500 | 0.484966460  | -1.073047220 |

|   |              |              |              |
|---|--------------|--------------|--------------|
| 6 | -3.544559600 | -0.873760820 | -0.216545920 |
| 1 | -3.035773350 | -3.242810030 | 0.941200380  |
| 6 | -2.509628440 | 1.063363060  | -1.246032760 |
| 6 | -3.666095580 | 0.362552230  | -0.792548520 |
| 6 | -0.134609570 | 1.009786150  | -1.883042890 |
| 1 | -4.426243330 | -1.466771940 | 0.031841530  |
| 6 | -2.638410380 | 2.331553790  | -1.887438510 |
| 1 | -4.647427980 | 0.805949280  | -0.968934210 |
| 6 | -1.528138440 | 3.001251450  | -2.325864920 |
| 6 | -0.256182230 | 2.354028890  | -2.349262270 |
| 6 | 1.043413730  | 0.263257500  | -2.290311760 |
| 1 | -3.631670290 | 2.775539350  | -1.969995420 |
| 1 | -1.604042670 | 4.015072830  | -2.722063910 |
| 6 | 0.889289480  | 3.038152360  | -2.852009420 |
| 6 | 2.107809990  | 2.416116980  | -2.881468470 |
| 6 | 1.119543270  | -1.177396530 | -2.446739940 |
| 1 | 0.781205160  | 4.078885760  | -3.161504150 |
| 1 | 3.009255200  | 2.960530400  | -3.167677190 |
| 6 | 2.212228830  | 1.017881920  | -2.620466060 |
| 6 | 3.476642010  | 0.367946300  | -2.716635490 |
| 6 | 2.531187510  | -3.209949730 | -2.371121220 |
| 1 | 4.554480870  | -1.475130990 | -2.514506430 |
| 6 | -0.009742860 | -2.035411530 | -2.777445370 |
| 1 | 4.360168160  | 0.976004230  | -2.917907180 |
| 6 | 1.434166910  | -4.019727580 | -2.445323470 |
| 6 | 0.148480640  | -3.459520500 | -2.718595700 |
| 1 | 3.531968640  | -3.635193170 | -2.275378230 |
| 6 | -1.229948810 | -1.539817440 | -3.303511440 |
| 1 | 1.532773390  | -5.104988180 | -2.384228100 |
| 6 | -0.946870140 | -4.302858480 | -3.032204260 |
| 6 | -2.146320780 | -3.779737800 | -3.476513480 |
| 6 | -2.269472320 | -2.386182240 | -3.648043320 |
| 1 | -1.340183700 | -0.471932570 | -3.471844060 |
| 1 | -0.808950590 | -5.383169470 | -2.954370700 |
| 1 | -2.976076670 | -4.440027440 | -3.731150860 |
| 1 | -3.186717040 | -1.967685460 | -4.063850660 |

## [11]helicene-exp

### Energy

$$E = -1767.046503 \quad E0 = -1766.493489$$

$$ZPVE = 0.553014 \text{ a.u.} = 347.0214 \text{ kcal/mol}$$

$$H298 = 367.7624 \text{ kcal/mol}$$

### Dipole Polarizability

$$651.805623$$

$$-261.744350 \quad 629.877925$$

$$202.954160 \quad 175.382275 \quad 803.157349$$

### Coordinates

|   |              |              |              |
|---|--------------|--------------|--------------|
| 1 | -5.751135360 | 1.030349440  | -3.173881830 |
| 6 | -5.217221750 | 1.424188660  | -2.308592540 |
| 1 | -3.738395050 | -0.161901010 | -2.293804190 |

|   |              |              |              |
|---|--------------|--------------|--------------|
| 6 | -4.084778070 | 0.752951540  | -1.812355240 |
| 6 | -5.649391140 | 2.584229210  | -1.688153640 |
| 6 | -4.972044370 | 3.106478090  | -0.561488670 |
| 6 | -3.816215240 | 2.432218050  | -0.056760170 |
| 6 | -3.401109460 | 1.250446410  | -0.712320970 |
| 6 | -5.442670480 | 4.301555510  | 0.081462140  |
| 6 | -4.815611760 | 4.805614610  | 1.181510970  |
| 6 | -3.654181860 | 4.165546480  | 1.729714220  |
| 6 | -3.129478180 | 2.981269430  | 1.109484580  |
| 6 | -1.977838700 | 2.396668210  | 1.660717890  |
| 6 | -3.024963030 | 4.670404940  | 2.876273690  |
| 6 | -1.894287240 | 4.064503020  | 3.434419950  |
| 6 | -1.335239050 | 2.902850490  | 2.798475170  |
| 6 | -1.303106900 | 4.578425540  | 4.640230450  |
| 6 | -0.226796050 | 3.971161320  | 5.210819830  |
| 6 | 0.382626990  | 2.817140180  | 4.607609840  |
| 6 | -0.137611470 | 2.289810220  | 3.377403810  |
| 6 | 0.528951430  | 1.206121980  | 2.786691700  |
| 6 | 1.652156320  | 0.593484630  | 3.362888320  |
| 6 | 2.115255560  | 1.082035010  | 4.631336280  |
| 6 | 1.482097560  | 2.190904530  | 5.206486980  |
| 6 | 2.359941570  | -0.525100050 | 2.738335510  |
| 6 | 3.418312140  | -1.166055840 | 3.467225620  |
| 6 | 3.814304720  | -0.661557040 | 4.753292530  |
| 6 | 3.207393160  | 0.428561470  | 5.298777520  |
| 6 | 2.062735160  | -0.995582290 | 1.450249500  |
| 6 | 2.729706400  | -2.079133430 | 0.859763620  |
| 6 | 3.733380310  | -2.758915520 | 1.629567240  |
| 6 | 4.059567960  | -2.275586350 | 2.902415380  |
| 6 | 2.450207930  | -2.544046490 | -0.500799520 |
| 6 | 3.127351950  | -3.716293320 | -0.984280670 |
| 6 | 4.089764670  | -4.385452600 | -0.151506500 |
| 6 | 4.392563750  | -3.917188850 | 1.090164880  |
| 6 | 1.565682450  | -1.885894750 | -1.365730440 |
| 6 | 1.302967710  | -2.328329700 | -2.672317200 |
| 6 | 1.954882950  | -3.523570560 | -3.129372380 |
| 6 | 2.851072130  | -4.180590300 | -2.274671370 |
| 6 | 0.406249660  | -1.621571450 | -3.583135320 |
| 6 | 0.184199920  | -2.156328590 | -4.890834510 |
| 6 | 0.842875930  | -3.368345040 | -5.291111360 |
| 6 | 1.694576940  | -4.020205080 | -4.450251040 |
| 1 | -6.528827260 | 3.113832390  | -2.059616650 |
| 1 | -2.530926890 | 0.704161120  | -0.349847470 |
| 1 | -6.325597490 | 4.795049790  | -0.328763360 |
| 1 | -5.187353340 | 5.708714070  | 1.668827540  |
| 1 | -1.577294540 | 1.500022040  | 1.193103120  |
| 1 | -3.438870380 | 5.560086940  | 3.356734380  |
| 1 | -1.752356130 | 5.460764150  | 5.099366290  |
| 1 | 0.202393760  | 4.355693490  | 6.137705210  |
| 1 | 0.153532780  | 0.817138090  | 1.842558080  |
| 1 | 1.855480970  | 2.576840530  | 6.157987070  |
| 1 | 4.629099170  | -1.164941390 | 5.276604210  |
| 1 | 3.528362000  | 0.818247000  | 6.266386620  |
| 1 | 1.285247320  | -0.490889280 | 0.880646200  |
| 1 | 4.845244500  | -2.777469090 | 3.472082030  |
| 1 | 4.587437850  | -5.271931270 | -0.548529270 |
| 1 | 5.139807270  | -4.419260050 | 1.707202420  |
| 1 | 1.073385450  | -0.981193840 | -1.016105360 |

|   |              |              |              |
|---|--------------|--------------|--------------|
| 1 | 3.359708590  | -5.078682290 | -2.633021790 |
| 1 | 0.650713390  | -3.753344020 | -6.294220700 |
| 1 | 2.197966480  | -4.935132840 | -4.767684070 |
| 6 | -0.678520640 | -1.480275690 | -5.785031420 |
| 6 | -1.308092040 | -0.302508590 | -5.419108450 |
| 6 | -1.088298970 | 0.231691260  | -4.136317710 |
| 6 | -0.250874830 | -0.417598940 | -3.240703880 |
| 1 | -0.836389940 | -1.904671830 | -6.778429930 |
| 1 | -1.967532850 | 0.210478620  | -6.119732720 |
| 1 | -1.578796320 | 1.159313040  | -3.840270460 |
| 1 | -0.097773940 | 0.024952090  | -2.256971890 |

## Kekulene

### Energy

$E = -1842.022169$        $E_0 = -1841.476059$

$ZPVE = 0.546110 \text{ a.u.} = 342.6895 \text{ kcal/mol}$

$H_{298} = 362.8681 \text{ kcal/mol}$

### Dipole Polarizability

1009.395977

0.120997    1008.834124

4.303218    -21.663623    232.507153

### Coordinates

|   |              |              |              |
|---|--------------|--------------|--------------|
| 6 | -4.145612880 | -4.718428490 | 0.118165390  |
| 6 | -2.975038090 | -5.425973430 | 0.138382850  |
| 6 | -1.692317580 | -4.770056010 | 0.126208540  |
| 6 | -4.160503140 | -3.278268820 | 0.079932810  |
| 6 | -2.907561550 | -2.583822350 | 0.063763430  |
| 6 | -1.659179790 | -3.338243260 | 0.091569010  |
| 6 | -0.474290420 | -5.474679400 | 0.150962260  |
| 6 | 0.771302050  | -4.819613480 | 0.141289820  |
| 6 | 0.796214160  | -3.387619950 | 0.106561460  |
| 6 | -0.418081070 | -2.699728960 | 0.087535480  |
| 6 | 2.026359850  | -5.526569420 | 0.168941850  |
| 6 | 3.224599040  | -4.866667530 | 0.163170320  |
| 6 | 3.297844120  | -3.428292430 | 0.125454980  |
| 6 | 2.074154830  | -2.684038690 | 0.094311770  |
| 6 | 2.141942160  | -1.290613330 | 0.049854020  |
| 6 | 4.517433490  | -2.725973670 | 0.113798560  |
| 6 | 4.572919810  | -1.320303860 | 0.073766100  |
| 6 | 3.344649960  | -0.583041820 | 0.042734800  |
| 6 | 5.813054320  | -0.587169210 | 0.058306150  |
| 6 | 5.840799630  | 0.779803390  | 0.014461930  |
| 6 | 4.631409550  | 1.562209480  | -0.015147970 |
| 6 | 3.374205890  | 0.874947820  | 0.001870340  |
| 6 | 2.201091030  | 1.630310330  | -0.019170910 |
| 6 | 2.189922750  | 3.025297730  | -0.064905990 |
| 6 | 3.442822070  | 3.719724640  | -0.082110240 |
| 6 | 4.632967550  | 2.968945820  | -0.056018150 |
| 6 | 0.941544310  | 3.779684650  | -0.092735000 |
| 6 | 0.974661160  | 5.211475510  | -0.128614430 |

|   |              |              |              |
|---|--------------|--------------|--------------|
| 6 | 2.257366780  | 5.867389800  | -0.141633510 |
| 6 | 3.427943370  | 5.159847490  | -0.121265540 |
| 6 | -0.299572760 | 3.141186680  | -0.087920460 |
| 6 | -1.513853210 | 3.829066730  | -0.107579530 |
| 6 | -1.488961710 | 5.261022960  | -0.143500660 |
| 6 | -0.243375610 | 5.916078210  | -0.153881150 |
| 6 | -2.791799090 | 3.125467450  | -0.094972030 |
| 6 | -4.015519050 | 3.869678870  | -0.127480800 |
| 6 | -3.942265570 | 5.308038760  | -0.166106100 |
| 6 | -2.744029010 | 5.967943460  | -0.172008110 |
| 6 | -2.859570460 | 1.732129900  | -0.049567160 |
| 6 | -4.062608520 | 1.024519680  | -0.043329730 |
| 6 | -5.290595480 | 1.761668050  | -0.075712760 |
| 6 | -5.235096400 | 3.167376900  | -0.116095080 |
| 6 | -4.092157680 | -0.433501480 | -0.002777170 |
| 6 | -5.349079580 | -1.120733480 | 0.013264290  |
| 6 | -6.558531640 | -0.338401230 | -0.017178480 |
| 6 | -6.530788040 | 1.028561100  | -0.061060200 |
| 6 | -2.918699830 | -1.188872200 | 0.018659990  |
| 6 | -5.350633090 | -2.527531670 | 0.053497960  |
| 1 | -5.101579520 | -5.245372230 | 0.129588270  |
| 1 | -2.997730420 | -6.517032620 | 0.165728110  |
| 1 | -0.496433350 | -6.566747730 | 0.179682420  |
| 1 | -0.396207660 | -1.615334100 | 0.073646640  |
| 1 | 2.004839760  | -6.617650800 | 0.196355440  |
| 1 | 4.158389540  | -5.431631140 | 0.186086450  |
| 1 | 1.213856960  | -0.730258760 | 0.014169860  |
| 1 | 5.452430430  | -3.291000160 | 0.135241450  |
| 1 | 6.747484400  | -1.151076350 | 0.081230260  |
| 1 | 6.797351030  | 1.305673590  | 0.002334420  |
| 1 | 1.250864620  | 1.107766230  | 0.005972170  |
| 1 | 5.590116960  | 3.495902010  | -0.066795320 |
| 1 | 2.280055010  | 6.958426700  | -0.169826120 |
| 1 | 4.383912830  | 5.686771430  | -0.133399840 |
| 1 | -0.321483870 | 2.056803080  | -0.073227000 |
| 1 | -0.221232340 | 7.008118260  | -0.183659650 |
| 1 | -4.876051780 | 5.872974570  | -0.189843460 |
| 1 | -2.722507490 | 7.059005000  | -0.200206130 |
| 1 | -1.931587060 | 1.171727300  | -0.012424400 |
| 1 | -6.170084320 | 3.732378010  | -0.138472680 |
| 1 | -7.515062090 | -0.864320870 | -0.005701300 |
| 1 | -7.465195790 | 1.592467000  | -0.084818420 |
| 1 | -1.968543530 | -0.666208450 | -0.006060580 |
| 1 | -6.307776510 | -3.054510680 | 0.063425220  |

## [12]helicene

### Energy

$$E = -1920.473679 \quad E_0 = -1919.878970$$

$$ZPVE = 0.594709 \text{ a.u.} = 373.1858 \text{ kcal/mol}$$

$$H_{298} = 395.5848 \text{ kcal/mol}$$

### Dipole Polarizability

$$663.218848$$

1.73149 664.720861

-41.864468 -19.010896 419.771788

## Coordinates

|   |              |              |              |
|---|--------------|--------------|--------------|
| 6 | 2.524570330  | -1.698583020 | -2.511540370 |
| 6 | 3.699637400  | -0.897244360 | -2.605328400 |
| 6 | 0.398261850  | -2.267967670 | 0.914517160  |
| 6 | 1.673898930  | -2.767628380 | 1.312679860  |
| 6 | 0.264624870  | -0.906208050 | 0.509625510  |
| 6 | 1.331011610  | 0.008334460  | 0.872511800  |
| 6 | 2.628239010  | -0.547545310 | 1.091284820  |
| 6 | 2.772937560  | -1.952060710 | 1.297798310  |
| 6 | 1.175611040  | 1.439004330  | 1.076308540  |
| 6 | 2.341489410  | 2.251375780  | 0.914973030  |
| 6 | 3.635008910  | 1.651153830  | 0.924912940  |
| 6 | 3.771548270  | 0.303770810  | 1.120331690  |
| 6 | -0.042263250 | 2.108779030  | 1.494877260  |
| 6 | -0.159540620 | 3.505481600  | 1.237897030  |
| 6 | 0.981328060  | 4.257938800  | 0.832988420  |
| 6 | 2.212711710  | 3.664000510  | 0.778270480  |
| 6 | -1.089668210 | 1.494736150  | 2.299178700  |
| 6 | -2.323549290 | 2.197267750  | 2.502290640  |
| 6 | -2.473055020 | 3.527773610  | 2.003797030  |
| 6 | -1.404456480 | 4.176107740  | 1.453923130  |
| 6 | -0.751220550 | -3.112363370 | 0.952078390  |
| 1 | 1.760868150  | -3.822278080 | 1.578761580  |
| 6 | -0.953297100 | -0.529527810 | -0.176780310 |
| 1 | 3.768825490  | -2.348074510 | 1.503273580  |
| 1 | 4.509662710  | 2.298326690  | 0.840640730  |
| 1 | 4.756101300  | -0.149434190 | 1.246792110  |
| 1 | 0.865837720  | 5.328677390  | 0.656208310  |
| 1 | 3.113475610  | 4.253502740  | 0.599196250  |
| 6 | -0.902785680 | 0.290723870  | 3.025139960  |
| 6 | -3.349695550 | 1.607224410  | 3.281899170  |
| 1 | -3.425988650 | 4.039923240  | 2.148440960  |
| 1 | -1.476015300 | 5.228275270  | 1.172089600  |
| 6 | -2.118966840 | -1.311669190 | 0.074155240  |
| 6 | -1.988275470 | -2.611064770 | 0.647924390  |
| 1 | -0.630636210 | -4.142207680 | 1.291977520  |
| 6 | -1.078821320 | 0.579980180  | -1.098524630 |
| 6 | -3.405231310 | -0.787604110 | -0.250803730 |
| 1 | -2.887591080 | -3.213099780 | 0.786317430  |
| 6 | -2.371413190 | 1.164177300  | -1.253826690 |
| 6 | -3.526080660 | 0.462648720  | -0.795225100 |
| 6 | -0.004479540 | 1.101763200  | -1.922415550 |
| 1 | -4.287435080 | -1.380857420 | -0.005580140 |
| 6 | -2.504795930 | 2.430332340  | -1.897651120 |
| 1 | -4.506750140 | 0.915458110  | -0.949830040 |
| 6 | -1.399430850 | 3.093796720  | -2.357253870 |
| 6 | -0.129368100 | 2.444249090  | -2.393351100 |
| 6 | 1.167357810  | 0.353082310  | -2.345216980 |
| 1 | -3.497735800 | 2.877209970  | -1.968500560 |
| 1 | -1.478549550 | 4.104940740  | -2.759956650 |
| 6 | 1.010280910  | 3.124652380  | -2.913931530 |
| 6 | 2.228682400  | 2.503083110  | -2.951601670 |
| 6 | 1.237724530  | -1.086568360 | -2.516704670 |
| 1 | 0.898794590  | 4.163658340  | -3.228202620 |

|   |              |              |              |
|---|--------------|--------------|--------------|
| 1 | 3.127529370  | 3.045739300  | -3.249179030 |
| 6 | 2.334483500  | 1.105976650  | -2.686086480 |
| 6 | 3.597126500  | 0.454100650  | -2.793600560 |
| 6 | 2.644806010  | -3.123745210 | -2.484982890 |
| 1 | 4.671728610  | -1.393275420 | -2.612962540 |
| 6 | 0.103207530  | -1.936414350 | -2.850819440 |
| 1 | 4.480318930  | 1.061522970  | -2.998461590 |
| 6 | 1.545688370  | -3.929753620 | -2.567947790 |
| 6 | 0.259528510  | -3.361885830 | -2.821745940 |
| 1 | 3.645231550  | -3.552817950 | -2.403214630 |
| 6 | -1.122383610 | -1.429340370 | -3.353197960 |
| 1 | 1.642661130  | -5.016169100 | -2.527989400 |
| 6 | -0.839219480 | -4.197432210 | -3.143487690 |
| 6 | -3.154922620 | 0.397698010  | 3.921174050  |
| 6 | -1.904030180 | -0.242959370 | 3.817814940  |
| 1 | -4.289057540 | 2.151095100  | 3.400201930  |
| 1 | -3.946574890 | -0.037949980 | 4.531771180  |
| 6 | -2.042176750 | -3.664337500 | -3.565723370 |
| 6 | -2.166039510 | -2.267533450 | -3.705120270 |
| 1 | -1.234438270 | -0.358039110 | -3.496297870 |
| 1 | -0.701724660 | -5.279239290 | -3.088921910 |
| 1 | -2.874975150 | -4.318502120 | -3.826197150 |
| 1 | -3.087692250 | -1.839328020 | -4.100760080 |
| 1 | -1.716197930 | -1.163448310 | 4.371669750  |
| 1 | 0.061148610  | -0.209166920 | 2.984440630  |

## [12]helicene-exp

### Energy

$$E = -1920.545798 \quad E0 = -1919.947468$$

$$ZPVE = 0.598330 \text{ a.u.} = 375.4575 \text{ kcal/mol}$$

$$H298 = 397.9545 \text{ kcal/mol}$$

### Dipole Polarizability

$$707.413182$$

$$-235.662434 \quad 701.836676$$

$$246.222780 \quad 211.717185 \quad 871.448508$$

### Coordinates

|   |              |              |              |
|---|--------------|--------------|--------------|
| 6 | -5.834978150 | -0.544913140 | -3.719655960 |
| 6 | -6.194246740 | 0.678880660  | -3.198740920 |
| 6 | -5.450389080 | 1.261271700  | -2.132574910 |
| 6 | -4.713782810 | -1.246087340 | -3.201016090 |
| 6 | -3.970357830 | -0.710407650 | -2.172294220 |
| 6 | -4.310566740 | 0.552769920  | -1.608712320 |
| 6 | -5.789515600 | 2.500505260  | -1.558446010 |
| 6 | -5.058907520 | 3.052370390  | -0.504551400 |
| 6 | -3.905563880 | 2.353462930  | 0.016376610  |
| 6 | -3.569746020 | 1.125084200  | -0.552992020 |
| 6 | -5.456445020 | 4.306536730  | 0.079961990  |
| 6 | -4.782517140 | 4.841891830  | 1.133110820  |
| 6 | -3.629989660 | 4.186478110  | 1.693061950  |
| 6 | -3.159672260 | 2.954107360  | 1.128112870  |



|   |              |              |              |
|---|--------------|--------------|--------------|
| 6 | -2.009518450 | 2.369945940  | 1.676162370  |
| 6 | -2.963948920 | 4.727768020  | 2.798382990  |
| 6 | -1.839550170 | 4.114993560  | 3.367436730  |
| 6 | -1.322727310 | 2.915597890  | 2.772536780  |
| 6 | -1.219619000 | 4.659181700  | 4.544077760  |
| 6 | -0.155468470 | 4.041776190  | 5.128318880  |
| 6 | 0.418405100  | 2.853974480  | 4.558702240  |
| 6 | -0.126020610 | 2.302408500  | 3.349180150  |
| 6 | 0.520783040  | 1.197598920  | 2.775003500  |
| 6 | 1.640563780  | 0.583125370  | 3.354627110  |
| 6 | 2.114220510  | 1.083655600  | 4.614800570  |
| 6 | 1.507480320  | 2.217928290  | 5.167822370  |
| 6 | 2.336314600  | -0.548680980 | 2.741215850  |
| 6 | 3.376213620  | -1.205225230 | 3.482336560  |
| 6 | 3.773703950  | -0.696262850 | 4.766411850  |
| 6 | 3.190454790  | 0.415590500  | 5.294003920  |
| 6 | 2.048839290  | -1.011975560 | 1.448863220  |
| 6 | 2.706430770  | -2.105161880 | 0.866051120  |
| 6 | 3.681834030  | -2.807708160 | 1.651239230  |
| 6 | 4.000713660  | -2.329898390 | 2.928388830  |
| 6 | 2.446139560  | -2.555151850 | -0.502709640 |
| 6 | 3.103314110  | -3.741595400 | -0.978495540 |
| 6 | 4.030791620  | -4.438079220 | -0.128477030 |
| 6 | 4.322325180  | -3.980342810 | 1.120075400  |
| 6 | 1.601832950  | -1.866268320 | -1.383451020 |
| 6 | 1.359224450  | -2.291394710 | -2.699353490 |
| 6 | 1.987354010  | -3.502118350 | -3.149278650 |
| 6 | 2.844319150  | -4.189886370 | -2.278278070 |
| 6 | 0.505943630  | -1.551579770 | -3.625382670 |
| 6 | 0.298410780  | -2.070925340 | -4.941490490 |
| 6 | 0.931757240  | -3.298545750 | -5.335285470 |
| 6 | 1.744468320  | -3.981096800 | -4.479975420 |
| 1 | -6.412744970 | -0.982995200 | -4.534304150 |
| 1 | -7.056950850 | 1.218880760  | -3.593349370 |
| 1 | -6.657332800 | 3.043261740  | -1.940742320 |
| 1 | -2.717211690 | 0.559065620  | -0.176172290 |
| 1 | -6.328260580 | 4.813809560  | -0.337054320 |
| 1 | -5.104638530 | 5.785351580  | 1.577338610  |
| 1 | -1.644404370 | 1.439239590  | 1.246944350  |
| 1 | -3.342098740 | 5.651846660  | 3.242004240  |
| 1 | -1.639027780 | 5.570381680  | 4.974161450  |
| 1 | 0.292113280  | 4.446404390  | 6.037769820  |
| 1 | 0.133085180  | 0.795667330  | 1.841162570  |
| 1 | 1.893834380  | 2.618024740  | 6.108219260  |
| 1 | 4.574157870  | -1.211150890 | 5.300567040  |
| 1 | 3.517459520  | 0.811398360  | 6.257108180  |
| 1 | 1.290227170  | -0.491035590 | 0.868486850  |
| 1 | 4.769307120  | -2.846194110 | 3.508396580  |
| 1 | 4.514048390  | -5.335547250 | -0.518605570 |
| 1 | 5.046043670  | -4.502115830 | 1.748714000  |
| 1 | 1.129292320  | -0.948869800 | -1.039780210 |
| 1 | 3.336813270  | -5.098958070 | -2.631517780 |
| 1 | 0.752815190  | -3.670567640 | -6.345769010 |
| 1 | 2.228972310  | -4.907605610 | -4.793123300 |
| 6 | -0.525113820 | -1.364340670 | -5.849094660 |
| 6 | -1.130795940 | -0.172867220 | -5.487206550 |
| 6 | -0.924540550 | 0.345728890  | -4.196125430 |
| 6 | -0.123808910 | -0.331557470 | -3.288433260 |

|   |              |              |              |
|---|--------------|--------------|--------------|
| 1 | -4.440623580 | -2.212930180 | -3.624552440 |
| 1 | -3.105117740 | -1.246785530 | -1.779261000 |
| 1 | -0.672758880 | -1.776762950 | -6.849118300 |
| 1 | -1.763152690 | 0.361681840  | -6.196362660 |
| 1 | -1.398554530 | 1.282834310  | -3.903326990 |
| 1 | 0.019286020  | 0.099309330  | -2.298090430 |

## [13]circulene

### Energy

E = -1995.499558      E0 = -1994.909429

ZIPVE = 0.590129 a.u. = 370.3115 kcal/mol

H298 = 392.1335 kcal/mol

### Dipole Polarizability

1087.760948

-35.637678    1135.064686

-9.393373      -5.070336    271.399082

### Coordinates

|   |              |              |              |
|---|--------------|--------------|--------------|
| 6 | -7.541327700 | 1.102963310  | 0.253250010  |
| 6 | -7.338578950 | 2.452927940  | 0.334658760  |
| 6 | -6.038886230 | 3.042866170  | 0.106283870  |
| 6 | -4.978833360 | 2.194249940  | -0.331198750 |
| 6 | -5.743621670 | 4.390400650  | 0.355504260  |
| 6 | -4.429708210 | 4.891975360  | 0.278684200  |
| 6 | -3.346389820 | 3.996169860  | -0.022095930 |
| 6 | -3.668744410 | 2.680259360  | -0.356492860 |
| 6 | -1.964082170 | 4.470940320  | 0.035333340  |
| 6 | -1.753121620 | 5.874120650  | 0.233669460  |
| 6 | -2.869419030 | 6.751921630  | 0.461331500  |
| 6 | -4.147115740 | 6.280344670  | 0.514920500  |
| 6 | -0.444433490 | 6.362608510  | 0.213013260  |
| 6 | 0.666007190  | 5.525717070  | 0.058944380  |
| 6 | 0.485320910  | 4.097147590  | -0.042482530 |
| 6 | -0.839205070 | 3.623817390  | -0.072959360 |
| 6 | 1.688250760  | 3.239377630  | -0.102882570 |
| 6 | 2.966493310  | 3.899576590  | -0.146796490 |
| 6 | 3.076935090  | 5.330544650  | -0.111058250 |
| 6 | 1.974692660  | 6.111616790  | 0.009996920  |
| 6 | 4.133899640  | 3.137173050  | -0.183710770 |
| 6 | 4.124197170  | 1.742904820  | -0.146291100 |
| 6 | 2.867596970  | 1.042389430  | -0.102544640 |
| 6 | 1.686200560  | 1.823246500  | -0.090801760 |
| 6 | 2.917770150  | -0.434180460 | -0.042057840 |
| 6 | 4.208204980  | -1.072953910 | 0.060310670  |
| 6 | 5.419706610  | -0.305967540 | 0.011857990  |
| 6 | 5.377888370  | 1.044261320  | -0.109802490 |
| 6 | 1.791388710  | -1.276573800 | -0.073251020 |
| 6 | 1.875754020  | -2.682228230 | 0.035173370  |
| 6 | 3.161671920  | -3.281686210 | 0.234807050  |
| 6 | 4.291986300  | -2.460876230 | 0.214727230  |
| 6 | 0.716177120  | -3.571956180 | -0.022900320 |

|   |              |              |              |
|---|--------------|--------------|--------------|
| 6 | 0.864067200  | -4.969804750 | 0.278238380  |
| 6 | 2.177246970  | -5.501424780 | 0.515406210  |
| 6 | 3.276334340  | -4.697101660 | 0.462706110  |
| 6 | -0.558610800 | -3.113534280 | -0.357786410 |
| 6 | -1.687642220 | -3.936884340 | -0.332624470 |
| 6 | -1.566181440 | -5.289338590 | 0.104902960  |
| 6 | -0.279972970 | -5.787801150 | 0.354556200  |
| 6 | -3.005964520 | -3.389733840 | -0.601931760 |
| 6 | -4.184698110 | -4.095271640 | -0.158721090 |
| 6 | -4.013184110 | -5.469565780 | 0.252184320  |
| 6 | -2.776030820 | -6.046572660 | 0.333392510  |
| 6 | -3.150690930 | -2.135259330 | -1.158958620 |
| 6 | -4.341583430 | -1.412448370 | -0.998638010 |
| 6 | -5.500846970 | -2.034846500 | -0.408260450 |
| 6 | -5.410918870 | -3.418857570 | -0.101697010 |
| 6 | -4.285833050 | -0.020414360 | -1.158313230 |
| 6 | -5.251299230 | 0.793216520  | -0.600783110 |
| 6 | -6.490715740 | 0.200608490  | -0.157759180 |
| 6 | -6.604593460 | -1.195186190 | -0.101238460 |
| 1 | -8.514610950 | 0.681470240  | 0.511526450  |
| 1 | -8.154402540 | 3.107567950  | 0.647014370  |
| 1 | -6.547396780 | 5.070091280  | 0.648283270  |
| 1 | -2.862961080 | 1.993601580  | -0.600979180 |
| 1 | -2.663192790 | 7.812206120  | 0.618116990  |
| 1 | -4.980221120 | 6.954096030  | 0.722525110  |
| 1 | -0.277322710 | 7.436240070  | 0.326864240  |
| 1 | -1.002544810 | 2.551216140  | -0.170945380 |
| 1 | 4.075288600  | 5.768716780  | -0.156222040 |
| 1 | 2.056850330  | 7.198195760  | 0.067012120  |
| 1 | 5.096164630  | 3.653709550  | -0.209867900 |
| 1 | 0.726750790  | 1.308196340  | -0.031784020 |
| 1 | 6.370722660  | -0.837824490 | 0.069615460  |
| 1 | 6.294784160  | 1.634196800  | -0.154768310 |
| 1 | 0.807219940  | -0.820066650 | -0.172086620 |
| 1 | 5.279067210  | -2.914849820 | 0.329407050  |
| 1 | 2.278262460  | -6.568069920 | 0.723182350  |
| 1 | 4.273884530  | -5.111067360 | 0.620299120  |
| 1 | -0.685590110 | -2.062511150 | -0.602356480 |
| 1 | -0.157700530 | -6.833289170 | 0.647425550  |
| 1 | -4.902297560 | -6.047829810 | 0.510507380  |
| 1 | -2.681177560 | -7.088298320 | 0.645636040  |
| 1 | -2.294826120 | -1.614763640 | -1.587196460 |
| 1 | -6.292517330 | -3.944972660 | 0.271509730  |
| 1 | -3.379175370 | 0.405439690  | -1.586608930 |
| 1 | -7.530194580 | -1.639370400 | 0.271945970  |

## [13]helicene

### Energy

$$E = -2073.966964 \quad E0 = -2073.327277$$

$$ZPVE = 0.639688 \text{ a.u.} = 401.4102 \text{ kcal/mol}$$

$$H298 = 425.5488 \text{ kcal/mol}$$

## Dipole Polarizability

690.751465

1.970171    697.514448

-32.189521    -55.242445    483.434429

## Coordinates

|   |              |              |              |
|---|--------------|--------------|--------------|
| 6 | 0.699808130  | -2.606477710 | -3.426148260 |
| 6 | 1.878075170  | -1.812134900 | -3.535758440 |
| 6 | -1.383554310 | -3.157342170 | 0.026752300  |
| 6 | -0.096183440 | -3.672973890 | 0.359467670  |
| 6 | -1.519761580 | -1.792063150 | -0.362981620 |
| 6 | -0.431760360 | -0.892751480 | -0.037706580 |
| 6 | 0.867990060  | -1.459779990 | 0.123093750  |
| 6 | 1.009491010  | -2.867969610 | 0.300589870  |
| 6 | -0.572153120 | 0.531282500  | 0.205333520  |
| 6 | 0.587569950  | 1.346179580  | 0.028843180  |
| 6 | 1.879345150  | 0.741533490  | -0.011814340 |
| 6 | 2.015184680  | -0.611750150 | 0.141085880  |
| 6 | -1.782505900 | 1.189926210  | 0.668703470  |
| 6 | -1.922489780 | 2.581865400  | 0.371300280  |
| 6 | -0.784187580 | 3.344008490  | -0.025626560 |
| 6 | 0.452488460  | 2.761298370  | -0.082381030 |
| 6 | -2.826236920 | 0.578291460  | 1.470776390  |
| 6 | -4.107805390 | 1.201363910  | 1.489572260  |
| 6 | -4.275251980 | 2.512629180  | 0.956834450  |
| 6 | -3.190968990 | 3.216274270  | 0.508129110  |
| 6 | -2.539300090 | -3.991554090 | 0.095765990  |
| 1 | -0.007293580 | -4.731258970 | 0.609811960  |
| 6 | -2.747351180 | -1.405480240 | -1.026460300 |
| 1 | 2.009901430  | -3.276338000 | 0.453543740  |
| 1 | 2.754148730  | 1.387451540  | -0.103436600 |
| 1 | 3.001495690  | -1.071017760 | 0.225234600  |
| 1 | -0.911599260 | 4.411875580  | -0.211083910 |
| 1 | 1.347992940  | 3.357852070  | -0.264111930 |
| 6 | -2.621105670 | -0.536598350 | 2.385633300  |
| 6 | -5.219592580 | 0.545532300  | 2.105971140  |
| 1 | -5.264892100 | 2.971047360  | 0.996982770  |
| 1 | -3.281646480 | 4.265071430  | 0.220374400  |
| 6 | -3.912278350 | -2.184843440 | -0.762326270 |
| 6 | -3.778645190 | -3.481955880 | -0.182663150 |
| 1 | -2.419051000 | -5.021709950 | 0.434369930  |
| 6 | -2.876784500 | -0.306582160 | -1.961307330 |
| 6 | -5.199267990 | -1.668233660 | -1.094744320 |
| 1 | -4.678887550 | -4.078068200 | -0.026003200 |
| 6 | -4.171091830 | 0.271732590  | -2.125750320 |
| 6 | -5.323731400 | -0.427622730 | -1.659910430 |
| 6 | -1.806271920 | 0.207751380  | -2.795584990 |
| 1 | -6.079959910 | -2.260526390 | -0.841510860 |
| 6 | -4.308169530 | 1.528870060  | -2.786392160 |
| 1 | -6.306088870 | 0.018498460  | -1.823997670 |
| 6 | -3.204367540 | 2.192996040  | -3.248787710 |
| 6 | -1.932194990 | 1.546880930  | -3.276128590 |
| 6 | -0.642171750 | -0.547029150 | -3.229744150 |
| 1 | -5.302978260 | 1.970371480  | -2.865411790 |
| 1 | -3.286121440 | 3.199844240  | -3.661651730 |
| 6 | -0.793162650 | 2.223626940  | -3.802747400 |

|   |              |              |              |
|---|--------------|--------------|--------------|
| 6 | 0.423174790  | 1.598401750  | -3.846523940 |
| 6 | -0.583214040 | -1.986478850 | -3.406359250 |
| 1 | -0.903910250 | 3.261966370  | -4.119645850 |
| 1 | 1.321823180  | 2.137526250  | -4.151062800 |
| 6 | 0.524558350  | 0.200062970  | -3.584782640 |
| 6 | 1.781199140  | -0.459013550 | -3.714238430 |
| 6 | 0.811967660  | -4.032372380 | -3.407489840 |
| 1 | 2.846764360  | -2.314185240 | -3.562758990 |
| 6 | -1.728237900 | -2.828953660 | -3.724383710 |
| 1 | 2.664851050  | 0.143857820  | -3.930353980 |
| 6 | -0.293098690 | -4.831650950 | -3.472709310 |
| 6 | -1.580150900 | -4.255445640 | -3.701609630 |
| 1 | 1.811148380  | -4.467454340 | -3.344542260 |
| 6 | -2.957734740 | -2.313694780 | -4.208481330 |
| 1 | -0.202007170 | -5.918718940 | -3.437175260 |
| 6 | -2.689044190 | -5.083663520 | -4.006718610 |
| 6 | -5.065047690 | -0.634698560 | 2.774839060  |
| 6 | -3.757672880 | -1.168652040 | 2.990646490  |
| 6 | -1.339015440 | -0.942392800 | 2.836275970  |
| 1 | -6.200268430 | 1.019212790  | 2.031438900  |
| 1 | -5.920979880 | -1.140472350 | 3.225220780  |
| 6 | -3.568575540 | -2.256013450 | 3.879790940  |
| 6 | -1.180562040 | -1.976756900 | 3.742257120  |
| 6 | -2.300940220 | -2.669179700 | 4.243174150  |
| 1 | -0.460159300 | -0.407244480 | 2.487385310  |
| 1 | -4.451266350 | -2.737156290 | 4.305876880  |
| 1 | -0.178334620 | -2.249695040 | 4.074548270  |
| 1 | -2.168671310 | -3.496691160 | 4.941073970  |
| 6 | -3.895163590 | -4.542465300 | -4.409274160 |
| 6 | -4.011922600 | -3.144840050 | -4.545699840 |
| 1 | -3.064929520 | -1.241744210 | -4.349656060 |
| 1 | -2.557303830 | -6.166371200 | -3.955949170 |
| 1 | -4.736150040 | -5.190983820 | -4.657276800 |
| 1 | -4.936479800 | -2.710229380 | -4.927374240 |

## [13]helicene-exp

### Energy

E = -2074.050594      E0 = -2073.406860

ZPVE = 0.643734 a.u. = 403.9494 kcal/mol

H298 = 428.2465 kcal/mol

### Dipole Polarizability

727.092356

-239.613461      784.174951

246.721796      225.249818      902.734886

### Coordinates

|   |              |              |              |
|---|--------------|--------------|--------------|
| 6 | -5.866874180 | -0.586208950 | -3.705506440 |
| 6 | -6.142062010 | 0.662029190  | -3.231848410 |
| 6 | -5.394043130 | 1.220727430  | -2.142036930 |
| 6 | -4.829216490 | -1.392253510 | -3.125238610 |
| 6 | -4.055626050 | -0.882797700 | -2.036192020 |

|   |              |              |              |
|---|--------------|--------------|--------------|
| 6 | -4.331362250 | 0.463287260  | -1.541759410 |
| 6 | -5.691607190 | 2.495376760  | -1.638825250 |
| 6 | -4.981357000 | 3.062097480  | -0.574816230 |
| 6 | -3.887113780 | 2.331976200  | 0.004096470  |
| 6 | -3.604427680 | 1.053659350  | -0.495539440 |
| 6 | -5.346171350 | 4.347993530  | -0.044262090 |
| 6 | -4.688374250 | 4.883813840  | 1.020630100  |
| 6 | -3.577163530 | 4.202977270  | 1.628339720  |
| 6 | -3.135799710 | 2.941491360  | 1.103158790  |
| 6 | -2.002471890 | 2.345938490  | 1.675183090  |
| 6 | -2.918372800 | 4.747451920  | 2.738050630  |
| 6 | -1.819516410 | 4.118097570  | 3.337038210  |
| 6 | -1.315080640 | 2.902505970  | 2.763697620  |
| 6 | -1.208369010 | 4.659725770  | 4.520016870  |
| 6 | -0.163922100 | 4.028754740  | 5.125656820  |
| 6 | 0.406964940  | 2.833195790  | 4.568000770  |
| 6 | -0.126825860 | 2.285490790  | 3.352593030  |
| 6 | 0.524824250  | 1.184582180  | 2.778376760  |
| 6 | 1.639063480  | 0.567535130  | 3.364983050  |
| 6 | 2.096116150  | 1.056251710  | 4.635568560  |
| 6 | 1.485334490  | 2.189274460  | 5.188345520  |
| 6 | 2.345535440  | -0.553417450 | 2.745457840  |
| 6 | 3.376009360  | -1.218793050 | 3.491272140  |
| 6 | 3.753410320  | -0.726427850 | 4.787971950  |
| 6 | 3.162752640  | 0.379239680  | 5.321273770  |
| 6 | 2.078767250  | -0.994893090 | 1.441197640  |
| 6 | 2.748130960  | -2.075762860 | 0.849578120  |
| 6 | 3.713265100  | -2.789398340 | 1.637734370  |
| 6 | 4.011471120  | -2.332862440 | 2.927903260  |
| 6 | 2.510399340  | -2.500708260 | -0.531308650 |
| 6 | 3.179512320  | -3.675569630 | -1.018751700 |
| 6 | 4.095717060  | -4.384743760 | -0.166843470 |
| 6 | 4.365720780  | -3.950109190 | 1.094889090  |
| 6 | 1.677068870  | -1.798345300 | -1.412166520 |
| 6 | 1.457059260  | -2.198474080 | -2.739981770 |
| 6 | 2.096207250  | -3.399013490 | -3.202088210 |
| 6 | 2.942176590  | -4.100057840 | -2.330686340 |
| 6 | 0.614926240  | -1.444755190 | -3.664743540 |
| 6 | 0.424994190  | -1.943210280 | -4.991212320 |
| 6 | 1.069253500  | -3.160860410 | -5.397863910 |
| 6 | 1.874107300  | -3.855160960 | -4.544447650 |
| 1 | -6.440202170 | -1.002737810 | -4.535788610 |
| 1 | -6.939964290 | 1.261626440  | -3.673620960 |
| 1 | -6.514663910 | 3.059261530  | -2.084305610 |
| 1 | -2.798508180 | 0.483179000  | -0.039443280 |
| 1 | -6.181870910 | 4.877646180  | -0.505055160 |
| 1 | -4.988875330 | 5.849359220  | 1.431262420  |
| 1 | -1.648929370 | 1.401308320  | 1.267329740  |
| 1 | -3.280756670 | 5.689096940  | 3.157238010  |
| 1 | -1.619623370 | 5.580104580  | 4.938249210  |
| 1 | 0.273882720  | 4.431760870  | 6.040584580  |
| 1 | 0.149260360  | 0.791756210  | 1.835789870  |
| 1 | 1.862605420  | 2.583889900  | 6.134736340  |
| 1 | 4.546458370  | -1.247471770 | 5.327172130  |
| 1 | 3.477160990  | 0.763058650  | 6.293390210  |
| 1 | 1.329772470  | -0.463916760 | 0.857475570  |
| 1 | 4.773201840  | -2.856797780 | 3.510135720  |
| 1 | 4.588520450  | -5.273058200 | -0.565966260 |

|   |              |              |              |
|---|--------------|--------------|--------------|
| 1 | 5.081217780  | -4.481583710 | 1.724808700  |
| 1 | 1.193832670  | -0.890269260 | -1.058802440 |
| 1 | 3.443085540  | -5.000935600 | -2.693107350 |
| 1 | 0.904916040  | -3.515915520 | -6.416906650 |
| 1 | 2.367071910  | -4.773797160 | -4.867585180 |
| 6 | -0.391893620 | -1.226413010 | -5.896441250 |
| 6 | -1.008175260 | -0.044544900 | -5.521392950 |
| 6 | -0.817406200 | 0.454648080  | -4.220269060 |
| 6 | -0.022636990 | -0.232829050 | -3.315287000 |
| 1 | -0.526520970 | -1.623211550 | -6.904555010 |
| 1 | -1.635134370 | 0.498584970  | -6.228894780 |
| 1 | -1.296755450 | 1.386322350  | -3.918483680 |
| 1 | 0.107730340  | 0.182806020  | -2.316844350 |
| 6 | -3.058774300 | -1.718757210 | -1.484080720 |
| 6 | -2.823790270 | -2.991717970 | -1.981700770 |
| 6 | -3.581798010 | -3.485010940 | -3.059008810 |
| 6 | -4.570233270 | -2.692560040 | -3.617854560 |
| 1 | -5.170024410 | -3.064054140 | -4.450987870 |
| 1 | -3.392471500 | -4.485811440 | -3.447825640 |
| 1 | -2.045778620 | -3.610882970 | -1.534266740 |
| 1 | -2.456712010 | -1.368265990 | -0.646639300 |

## Septulene

### Energy

$$E = -2149.011634 \quad E0 = -2148.376322$$

$$ZPVE = 0.635312 \text{ a.u.} = 398.6643 \text{ kcal/mol}$$

$$H298 = 422.3387 \text{ kcal/mol}$$

### Dipole Polarizability

$$351.232210$$

$$0.614085 \quad 1195.763829$$

$$0.000041 \quad -0.000027 \quad 1195.726050$$

### Coordinates

|   |              |              |              |
|---|--------------|--------------|--------------|
| 6 | -1.519046040 | 0.905671660  | 6.559958890  |
| 6 | -1.255647890 | 2.213982450  | 6.315727800  |
| 6 | -0.636788790 | -3.789277740 | 5.653404560  |
| 6 | -0.051243710 | -4.764705820 | 4.912768410  |
| 6 | 0.724942680  | 5.760464050  | 3.602385820  |
| 6 | 1.195205470  | 6.253451400  | 2.428539000  |
| 6 | 1.541401140  | -6.580750940 | 0.678333090  |
| 6 | 1.541401490  | -6.580750790 | -0.678332720 |
| 6 | 1.195203080  | 6.253451740  | -2.428539220 |
| 6 | 0.724939500  | 5.760464380  | -3.602385710 |
| 6 | -0.051247580 | -4.764707490 | -4.912766790 |
| 6 | -0.636787340 | -3.789277810 | -5.653405020 |
| 6 | -1.255648890 | 2.213982030  | -6.315727790 |
| 6 | -1.519045870 | 0.905671110  | -6.559959270 |
| 6 | -1.228466050 | -1.440687750 | 5.964493920  |
| 6 | -0.301980860 | 3.950962540  | 4.886646190  |
| 6 | 0.848723780  | -5.561186860 | 2.784109220  |
| 6 | 1.363218060  | 6.099798950  | -0.000000220 |

|   |              |              |              |
|---|--------------|--------------|--------------|
| 6 | 0.848724070  | -5.561186780 | -2.784108810 |
| 6 | -0.301983530 | 3.950962460  | -4.886645770 |
| 6 | -1.228464840 | -1.440688080 | -5.964494460 |
| 6 | -0.342385570 | -0.786976590 | 3.406296440  |
| 6 | -0.085853870 | 2.192356760  | 2.739721290  |
| 6 | 0.239814250  | -3.150745030 | 1.530589710  |
| 6 | 0.379192330  | 3.494064160  | 0.000000080  |
| 6 | 0.239813430  | -3.150745260 | -1.530589250 |
| 6 | -0.085855450 | 2.192356690  | -2.739720990 |
| 6 | -0.342387600 | -0.786977010 | -3.406295900 |
| 6 | -1.182046800 | -0.097155580 | 5.590415350  |
| 6 | -0.776161640 | -2.461106190 | 5.128173750  |
| 6 | -0.697144340 | 2.624202450  | 5.059791690  |
| 6 | 0.215249470  | 4.421864830  | 3.679916760  |
| 6 | 0.310348230  | -4.524108470 | 3.545380580  |
| 6 | 1.043305010  | -5.449519610 | 1.406806050  |
| 6 | 1.086035280  | 5.485011560  | 1.221338390  |
| 6 | 1.043305370  | -5.449519450 | -1.406805680 |
| 6 | 1.086034120  | 5.485011680  | -1.221338640 |
| 6 | 0.310347100  | -4.524108940 | -3.545379970 |
| 6 | 0.215246780  | 4.421864960  | -3.679916440 |
| 6 | -0.776161200 | -2.461106540 | -5.128173900 |
| 6 | -0.697146240 | 2.624202170  | -5.059791330 |
| 6 | -1.182046760 | -0.097155990 | -5.590415560 |
| 6 | -0.693991320 | 0.258960080  | 4.283989370  |
| 6 | -0.366482660 | -2.142682090 | 3.786330120  |
| 6 | -0.499980220 | 1.684168840  | 3.987474860  |
| 6 | 0.237373490  | 3.548063660  | 2.536476400  |
| 6 | 0.072488030  | -3.247911880 | 2.925062480  |
| 6 | 0.663444040  | -4.234652110 | 0.734290750  |
| 6 | 0.587930940  | 4.135081700  | 1.237282410  |
| 6 | 0.587929910  | 4.135081760  | -1.237282380 |
| 6 | 0.663443970  | -4.234652090 | -0.734290350 |
| 6 | 0.072487000  | -3.247912190 | -2.925062020 |
| 6 | 0.237371610  | 3.548063710  | -2.536476170 |
| 6 | -0.499981920 | 1.684168590  | -3.987474490 |
| 6 | -0.366483940 | -2.142682550 | -3.786329720 |
| 6 | -0.693992620 | 0.258959730  | -4.283989080 |
| 1 | -1.931034910 | 0.581275920  | 7.516836080  |
| 1 | -1.447155350 | 2.979175460  | 7.069716520  |
| 1 | -0.956862870 | -3.974705650 | 6.679934810  |
| 1 | 0.118445580  | -5.761166540 | 5.323764840  |
| 1 | 0.737148260  | 6.361514140  | 4.513017490  |
| 1 | 1.600893260  | 7.264213320  | 2.362435570  |
| 1 | 1.876462690  | -7.451988520 | 1.243399660  |
| 1 | 1.876463380  | -7.451988220 | -1.243399310 |
| 1 | 1.600890620  | 7.264213770  | -2.362435980 |
| 1 | 0.737144240  | 6.361514540  | -4.513017340 |
| 1 | 0.118458610  | -5.761163080 | -5.323768640 |
| 1 | -0.956855220 | -3.974703990 | -6.679937520 |
| 1 | -1.447156450 | 2.979175050  | -7.069716480 |
| 1 | -1.931033730 | 0.581275170  | -7.516836840 |
| 1 | -1.554285270 | -1.693756620 | 6.976006740  |
| 1 | -0.382005410 | 4.639314430  | 5.731127730  |
| 1 | 1.073747190  | -6.512344410 | 3.271980780  |
| 1 | 1.724667130  | 7.130680980  | -0.000000350 |
| 1 | 1.073747900  | -6.512344230 | -3.271980380 |
| 1 | -0.382008430 | 4.639314310  | -5.731127310 |



|   |              |              |              |
|---|--------------|--------------|--------------|
| 1 | -1.554282550 | -1.693756870 | -6.976007780 |
| 1 | 0.045704340  | -0.534302580 | 2.419498980  |
| 1 | 0.008268370  | 1.504503270  | 1.899368160  |
| 1 | -0.026627700 | -2.212981290 | 1.043014980  |
| 1 | -0.051055270 | 2.492448730  | 0.000000230  |
| 1 | -0.026629190 | -2.212981750 | -1.043014440 |
| 1 | 0.008267410  | 1.504503200  | -1.899367920 |
| 1 | 0.045701310  | -0.534303030 | -2.419498030 |

## [14]helicene

### Energy

$$E = -2227.460097 \quad E0 = -2226.775419$$

$$ZPVE = 0.684678 \text{ a.u.} = 429.6419 \text{ kcal/mol}$$

$$H298 = 455.5316 \text{ kcal/mol}$$

### Dipole Polarizability

$$742.777397$$

$$-0.664173 \quad 719.461812$$

$$-0.885220 \quad -70.384028 \quad 533.481450$$

### Coordinates

|   |              |              |              |
|---|--------------|--------------|--------------|
| 6 | 0.625853170  | -2.540792380 | -3.466529010 |
| 6 | 1.808643960  | -1.755720480 | -3.603067050 |
| 6 | -1.378532930 | -3.151039970 | 0.029689380  |
| 6 | -0.089309750 | -3.668041080 | 0.353223620  |
| 6 | -1.516300820 | -1.786113790 | -0.361001960 |
| 6 | -0.424982980 | -0.889489960 | -0.037314240 |
| 6 | 0.876435490  | -1.457847710 | 0.105633150  |
| 6 | 1.017915340  | -2.866357040 | 0.280659280  |
| 6 | -0.562679450 | 0.530608180  | 0.230609630  |
| 6 | 0.594505040  | 1.349061390  | 0.053780180  |
| 6 | 1.885564470  | 0.745482450  | -0.019569890 |
| 6 | 2.023794240  | -0.609602300 | 0.114389800  |
| 6 | -1.765635890 | 1.178408690  | 0.726680870  |
| 6 | -1.908991720 | 2.577626880  | 0.467091700  |
| 6 | -0.776472200 | 3.348546980  | 0.071084900  |
| 6 | 0.458282340  | 2.766299310  | -0.022170230 |
| 6 | -2.798178620 | 0.548164460  | 1.529334920  |
| 6 | -4.079672440 | 1.169349610  | 1.579260910  |
| 6 | -4.253604830 | 2.493787890  | 1.082532510  |
| 6 | -3.174777170 | 3.208922420  | 0.638983270  |
| 6 | -2.534679550 | -3.983090290 | 0.108687250  |
| 1 | -0.000915840 | -4.726087980 | 0.605090240  |
| 6 | -2.748317810 | -1.396749710 | -1.015835950 |
| 1 | 2.019257830  | -3.276228620 | 0.423288870  |
| 1 | 2.758774830  | 1.392943890  | -0.115398540 |
| 1 | 3.011285990  | -1.069565040 | 0.179417650  |
| 1 | -0.905475940 | 4.420958340  | -0.084952890 |
| 1 | 1.351123700  | 3.366740090  | -0.204349900 |
| 6 | -2.579242330 | -0.583571630 | 2.419810790  |
| 6 | -5.183024620 | 0.497760790  | 2.193857870  |
| 1 | -5.242631970 | 2.950791570  | 1.146457840  |

|   |              |              |              |
|---|--------------|--------------|--------------|
| 1 | -3.268826220 | 4.264720290  | 0.379289060  |
| 6 | -3.911451450 | -2.178177330 | -0.748408210 |
| 6 | -3.774786320 | -3.474277200 | -0.167924920 |
| 1 | -2.414203880 | -5.011870290 | 0.451814750  |
| 6 | -2.890256930 | -0.274969820 | -1.921359440 |
| 6 | -5.201644460 | -1.656959380 | -1.063507600 |
| 1 | -4.674418410 | -4.069923800 | -0.005526070 |
| 6 | -4.183507270 | 0.313760270  | -2.045959730 |
| 6 | -5.331926340 | -0.402426040 | -1.594903430 |
| 6 | -1.828882100 | 0.274496540  | -2.740662000 |
| 1 | -6.079906040 | -2.255681830 | -0.817165150 |
| 6 | -4.319462520 | 1.605625990  | -2.634640090 |
| 1 | -6.316045150 | 0.046246190  | -1.739286580 |
| 6 | -3.216488200 | 2.288569870  | -3.071609790 |
| 6 | -1.951768940 | 1.634516900  | -3.156031600 |
| 6 | -0.687491630 | -0.471555660 | -3.238817360 |
| 1 | -5.312342420 | 2.056232830  | -2.677675230 |
| 1 | -3.296541080 | 3.317614120  | -3.426119650 |
| 6 | -0.819488980 | 2.317758280  | -3.691956930 |
| 6 | 0.386370030  | 1.680114650  | -3.803808500 |
| 6 | -0.656402710 | -1.907070430 | -3.464688810 |
| 1 | -0.925521880 | 3.369806830  | -3.961908120 |
| 1 | 1.281234300  | 2.220461150  | -4.117079080 |
| 6 | 0.478608220  | 0.271017550  | -3.597554240 |
| 6 | 1.723505370  | -0.400917010 | -3.775625510 |
| 6 | 0.720427040  | -3.959179830 | -3.368425950 |
| 1 | 2.771914800  | -2.267535410 | -3.638035730 |
| 6 | -1.804736210 | -2.742596570 | -3.765877720 |
| 1 | 2.609427760  | 0.194304650  | -4.002971330 |
| 6 | -0.409385320 | -4.728293230 | -3.304323660 |
| 6 | -1.687108650 | -4.145865620 | -3.547953860 |
| 1 | 1.712008710  | -4.411786700 | -3.314534400 |
| 6 | -3.015815270 | -2.277680370 | -4.428341760 |
| 1 | -0.346397820 | -5.807551270 | -3.154843680 |
| 6 | -2.838378300 | -4.989396100 | -3.644078650 |
| 6 | -5.018049810 | -0.695638950 | 2.836397970  |
| 6 | -3.706747180 | -1.229616910 | 3.026947410  |
| 6 | -1.290631000 | -0.992911050 | 2.848162940  |
| 1 | -6.165423750 | 0.970696310  | 2.140507080  |
| 1 | -5.867226100 | -1.213000240 | 3.286415890  |
| 6 | -3.503861300 | -2.331563630 | 3.894805120  |
| 6 | -1.118459920 | -2.041737780 | 3.734761750  |
| 6 | -2.230764860 | -2.746252550 | 4.236829490  |
| 1 | -0.417625360 | -0.449596250 | 2.497204330  |
| 1 | -4.380005870 | -2.822914000 | 4.322764550  |
| 1 | -0.111539540 | -2.317055930 | 4.050511450  |
| 1 | -2.087819990 | -3.584764160 | 4.919358480  |
| 6 | -4.046547230 | -4.497092710 | -4.046921830 |
| 6 | -4.149962230 | -3.151376760 | -4.515310760 |
| 1 | -2.723202360 | -6.045066830 | -3.391266420 |
| 1 | -4.926035330 | -5.141332370 | -4.099244450 |
| 6 | -3.087908320 | -1.051033960 | -5.136671490 |
| 6 | -5.332802280 | -2.708075300 | -5.157988540 |
| 1 | -6.191120710 | -3.382343250 | -5.187174120 |
| 6 | -5.388437860 | -1.475330820 | -5.780074520 |
| 1 | -6.298953820 | -1.152794220 | -6.286345730 |
| 6 | -4.239149290 | -0.660201390 | -5.798194310 |
| 1 | -4.249944700 | 0.284530380  | -6.342949650 |

1        -2.207659270        -0.416277450        -5.189028250

## [14]helicene-exp

### Energy

E = -2227.550737        E0 = -2226.861612

ZPVE = 0.689125 a.u. = 432.4322 kcal/mol

H298 = 458.4746 kcal/mol

### Dipole Polarizability

768.897467

-262.505205        882.865538

242.260124        252.430177        938.928305

### Coordinates

|   |              |              |              |
|---|--------------|--------------|--------------|
| 6 | -5.803633660 | -0.584423190 | -3.763590200 |
| 6 | -6.087812980 | 0.652284840  | -3.273386260 |
| 6 | -5.348236770 | 1.205238200  | -2.169334690 |
| 6 | -4.762785710 | -1.397483340 | -3.190868470 |
| 6 | -3.991538470 | -0.892345870 | -2.077992470 |
| 6 | -4.282557310 | 0.452996050  | -1.570941710 |
| 6 | -5.661304130 | 2.469521960  | -1.657260020 |
| 6 | -4.963103610 | 3.035023850  | -0.581775050 |
| 6 | -3.865696440 | 2.312191820  | -0.004746480 |
| 6 | -3.567222340 | 1.039846410  | -0.518124630 |
| 6 | -5.346474560 | 4.310858650  | -0.043083210 |
| 6 | -4.701846900 | 4.843892480  | 1.031827340  |
| 6 | -3.588176690 | 4.169140180  | 1.639359590  |
| 6 | -3.127987350 | 2.917981780  | 1.104144640  |
| 6 | -1.990494460 | 2.330402050  | 1.678624360  |
| 6 | -2.945191260 | 4.708738160  | 2.760790840  |
| 6 | -1.844248650 | 4.086307790  | 3.361557420  |
| 6 | -1.318148110 | 2.884233270  | 2.777755010  |
| 6 | -1.253111420 | 4.621729610  | 4.557387020  |
| 6 | -0.206512850 | 3.997700660  | 5.165731280  |
| 6 | 0.387904300  | 2.818816710  | 4.597304320  |
| 6 | -0.124407580 | 2.278940420  | 3.369105060  |
| 6 | 0.552770280  | 1.197943840  | 2.786272870  |
| 6 | 1.672944290  | 0.592870250  | 3.375281500  |
| 6 | 2.107560000  | 1.071602160  | 4.657460960  |
| 6 | 1.470484330  | 2.185034580  | 5.219910220  |
| 6 | 2.408789960  | -0.504447790 | 2.747317950  |
| 6 | 3.446766740  | -1.157569380 | 3.493969540  |
| 6 | 3.800179130  | -0.677708040 | 4.801896270  |
| 6 | 3.180329480  | 0.406677900  | 5.345212010  |
| 6 | 2.164264880  | -0.934207180 | 1.434654480  |
| 6 | 2.864224940  | -1.990923730 | 0.834294920  |
| 6 | 3.839956630  | -2.691693900 | 1.621157900  |
| 6 | 4.114135650  | -2.247525350 | 2.920749000  |
| 6 | 2.647743930  | -2.404042990 | -0.553764070 |
| 6 | 3.351554710  | -3.554185810 | -1.051393860 |
| 6 | 4.280229370  | -4.250077850 | -0.202146490 |
| 6 | 4.527520410  | -3.826938080 | 1.068077820  |

|   |              |              |              |
|---|--------------|--------------|--------------|
| 6 | 1.799179960  | -1.715468550 | -1.430863190 |
| 6 | 1.594164480  | -2.108150460 | -2.763089970 |
| 6 | 2.271062880  | -3.282825570 | -3.236743890 |
| 6 | 3.134202910  | -3.968370080 | -2.370086560 |
| 6 | 0.725893740  | -1.374733920 | -3.679553250 |
| 6 | 0.551892030  | -1.866183650 | -5.010760220 |
| 6 | 1.238348820  | -3.055848680 | -5.430573430 |
| 6 | 2.066340050  | -3.731016130 | -4.584310890 |
| 1 | -6.370027970 | -0.992122020 | -4.602898920 |
| 1 | -6.886911230 | 1.253579210  | -3.710635870 |
| 1 | -6.486882460 | 3.029761750  | -2.102661910 |
| 1 | -2.756316270 | 0.474298150  | -0.064170450 |
| 1 | -6.185090190 | 4.835171470  | -0.504657770 |
| 1 | -5.015942050 | 5.801704140  | 1.450274030  |
| 1 | -1.622006850 | 1.394596460  | 1.263441750  |
| 1 | -3.323081140 | 5.640649450  | 3.187949950  |
| 1 | -1.682037070 | 5.530702340  | 4.982759460  |
| 1 | 0.216166150  | 4.394286070  | 6.090496120  |
| 1 | 0.194005570  | 0.812574970  | 1.833928540  |
| 1 | 1.831178500  | 2.572889230  | 6.175489490  |
| 1 | 4.598680020  | -1.190013730 | 5.341452550  |
| 1 | 3.475845170  | 0.782525540  | 6.326326730  |
| 1 | 1.408702590  | -0.412282530 | 0.851146490  |
| 1 | 4.882617360  | -2.761567890 | 3.502938270  |
| 1 | 4.800059830  | -5.119032060 | -0.609603860 |
| 1 | 5.251309620  | -4.348196220 | 1.697016080  |
| 1 | 1.288370920  | -0.825820600 | -1.069386900 |
| 1 | 3.663123340  | -4.849703460 | -2.740720860 |
| 1 | 1.085775730  | -3.405511940 | -6.453247010 |
| 1 | 2.590163970  | -4.629017690 | -4.916748190 |
| 6 | -0.290987320 | -1.169591080 | -5.907827980 |
| 6 | -0.948205550 | -0.014008460 | -5.520279660 |
| 6 | -0.773469900 | 0.478525870  | -4.214409660 |
| 6 | 0.046350200  | -0.189695070 | -3.317219610 |
| 1 | -0.412967320 | -1.560872940 | -6.919673070 |
| 1 | -1.594882840 | 0.513719220  | -6.221679120 |
| 1 | -1.285159410 | 1.389499660  | -3.902613850 |
| 1 | 0.162942810  | 0.220093200  | -2.314612060 |
| 6 | -3.007347290 | -1.716101710 | -1.533114040 |
| 6 | -2.736592020 | -3.005191100 | -2.036547280 |
| 6 | -3.500929470 | -3.498761590 | -3.153223270 |
| 6 | -4.500851410 | -2.671674560 | -3.697504510 |
| 1 | -5.092693800 | -3.037667040 | -4.539849630 |
| 1 | -2.412734000 | -1.376118870 | -0.684708320 |
| 6 | -1.726631600 | -3.837987460 | -1.474854300 |
| 6 | -1.481589380 | -5.092194270 | -1.989454710 |
| 6 | -2.235736850 | -5.578015500 | -3.090821690 |
| 6 | -3.221621720 | -4.800952280 | -3.658280650 |
| 1 | -3.803909610 | -5.172340680 | -4.503632300 |
| 1 | -2.029811740 | -6.573723540 | -3.485233290 |
| 1 | -0.703533800 | -5.718352710 | -1.551811370 |
| 1 | -1.144166140 | -3.463817390 | -0.631033740 |

# Ethylene

## Energy

E = -78.502240      E0 = -78.452690

ZPVE = 0.049549 a.u. = 31.0927 kcal/mol

H298 = 33.6131 kcal/mol

## Dipole Polarizability

17.210355

0.000000      23.560396

0.000000      -0.000000      35.154584

## Coordinates

|   |             |             |              |
|---|-------------|-------------|--------------|
| 6 | 4.326189530 | 2.838997860 | -0.584507270 |
| 6 | 4.326189530 | 2.838997860 | 0.749354470  |
| 1 | 4.326189530 | 3.767347070 | -1.157373990 |
| 1 | 4.326189530 | 1.910648650 | -1.157373990 |
| 1 | 4.326189530 | 3.767347110 | 1.322221200  |
| 1 | 4.326189530 | 1.910648620 | 1.322221200  |
